# Supplementary material for: MAIT Cells Are Major Contributors to the Cytokine Response in Group A Streptococcal Toxic Shock Syndrome
Source: PubMed Central journal article supplement — Proc Natl Acad Sci U S A. 2019 Nov 26;116(51):25923–31. doi: 10.1073/pnas.1910883116 (PMC6926028; doi:10.1073/pnas.1910883116), 2019-11-26
Supplement: pnas.1910883116.sapp.pdf [file pnas.1910883116.sapp.pdf]

# PNAS

[www.pnas.org](http://www.pnas.org)

Supplementary Information for

MAIT Cells Are Major Contributors to the Cytokine Response in Group A Streptococcal Toxic Shock Syndrome

Emgård Johanna, Bergsten Helena, McCormick John K., Barrantes Israel, Skrede Steinar, Sandberg Johan K, Norrby-Teglund Anna

Corresponding author: Anna Norrby-Teglund  
Email: [anna.norrby-teglund@ki.se](mailto:anna.norrby-teglund@ki.se)

**This PDF file includes:**

Figures S1 to S3  
Table S1

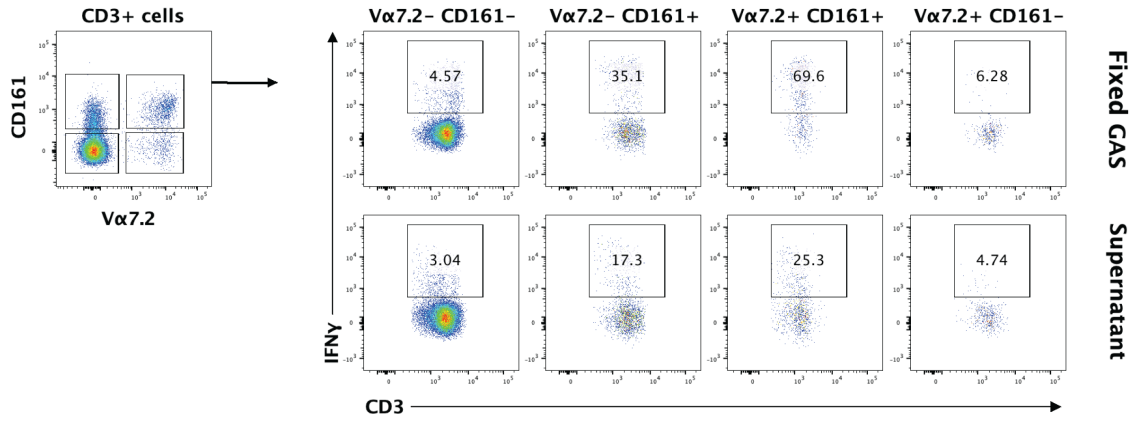

**Fig. S1.** MAIT cells are the main IFN $\gamma$  producing subset in response to fixed GAS 2006 or GAS 2006 supernatant. PBMC were stimulated with GAS for 24 hours and the frequencies of IFN $\gamma$ + cells among CD3+ subsets were assessed by flow cytometry. The figure shows one representative donor.

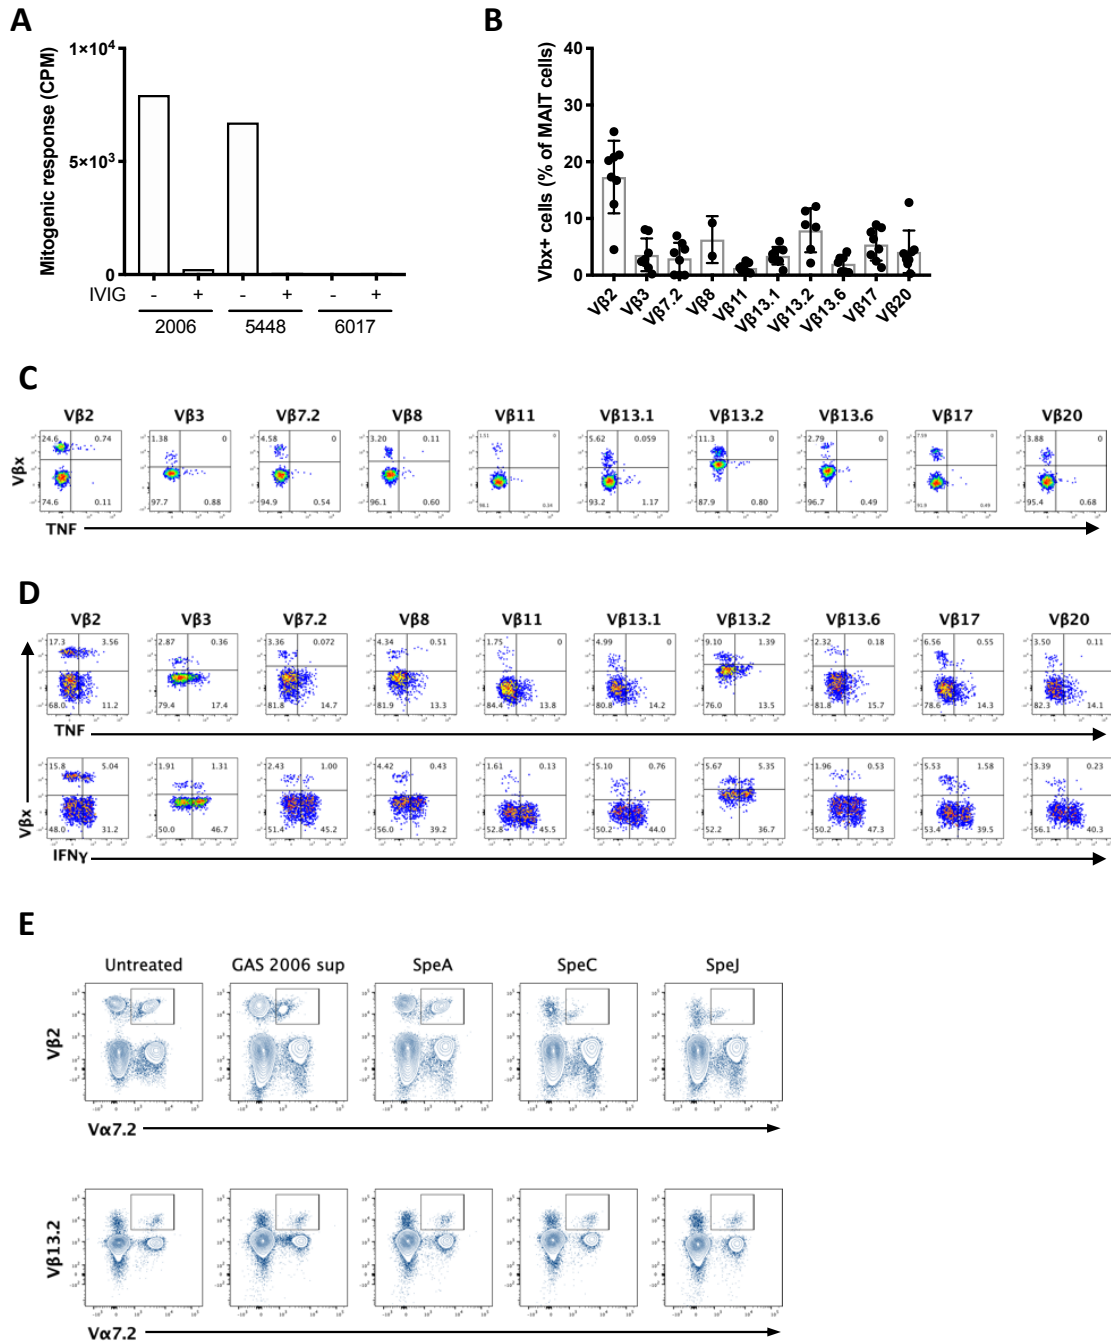

**Fig. S2.** Early TNF production by MAIT cells in response to GAS supernatant is Vβ2-specific. (A) Superantigenic activity of GAS (2006 and 5448) and GGS (6017) supernatants towards human PBMCs after 72 hours of stimulation in the presence or absence of 1 mg/ml IVIG. Mitogenic response of PBMCs measured as counts per minute (CPM). (B) Mean ± SD frequencies of Vβx+ MAIT cells in unstimulated cultures assessed by flow cytometry. (C-D) PBMC were stimulated with GAS 2006 supernatant for (C) 8 hours or (D) 24 hours. FACS plots show cytokine production in Vβx+ and Vβx- MAIT cells in one representative donor. (E) Vα7.2 expression among Vβ2 or Vβ13.2 MAIT cells after 8 hours of stimulation with superantigens or GAS supernatant.

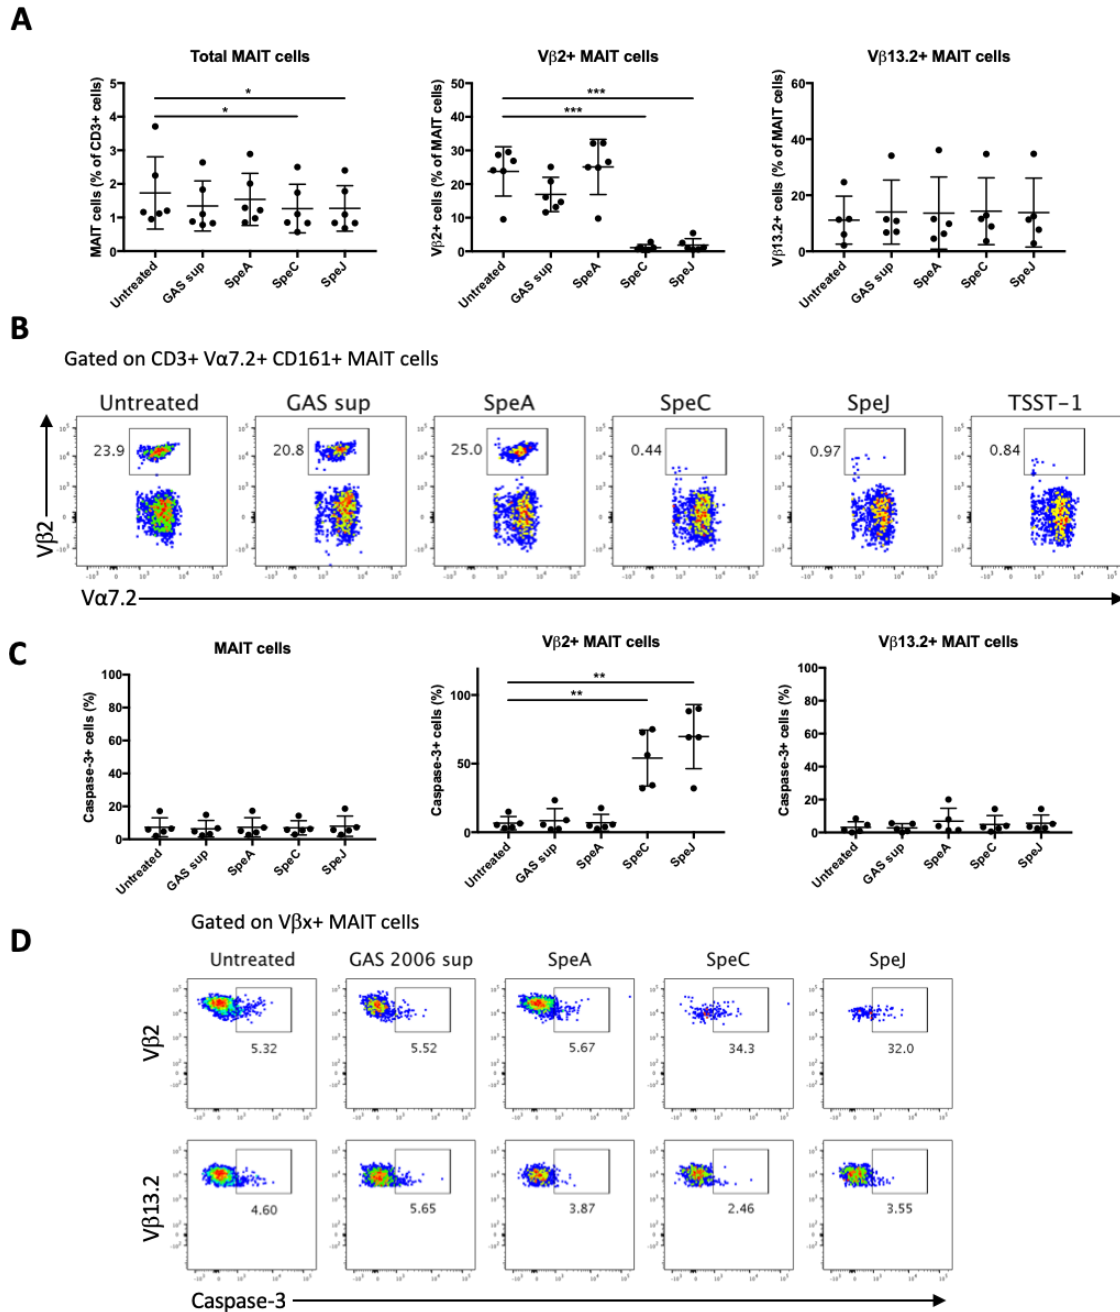

**Fig S3.** Vβ2+ MAIT cells are lost after stimulation with Vβ2-specific superantigens. (A-B) PBMC were stimulated with GAS 2006 supernatant or recombinant superantigens for 8 hours and total MAIT cell, Vβ2+ MAIT cell, and Vβ13.2+ MAIT cell frequencies were assessed by flow cytometry. (A) Mean frequencies  $\pm$  SD of 6 donors. (B) Representative plots of Vβ2+ MAIT cells in one donor. (C-D) PBMC were stimulated with GAS 2006 supernatant or recombinant superantigens for 8 hours and caspase-3 expression was assessed in total MAIT cells, Vβ2+ MAIT cells, and Vβ13.2+ MAIT cells by flow cytometry. (C) Mean frequency  $\pm$  SD of caspase-3+ cells in 5 donors. (D) Caspase-3 expression in one representative donor. (A and C) Paired *t* test was used to detect significant differences between samples. \*\*\**P* < 0.001; \*\**P* < 0.01; \**P* < 0.05

**Table S1.** Antibodies used for flow cytometry.

| <b>Antibody name</b>                                                                                                                                                                                                                                                | <b>Clone</b>                                                                                                   | <b>Antibody source</b>                |
|---------------------------------------------------------------------------------------------------------------------------------------------------------------------------------------------------------------------------------------------------------------------|----------------------------------------------------------------------------------------------------------------|---------------------------------------|
| anti-Caspase-3 BV650<br>anti-CD3 FITC<br>anti-CD25 BUV395<br>anti-CD56 BUV737<br>anti-CD69 AF700<br>anti-CD161 PECy5<br>anti-HLA-DR APC-H7<br>anti-IFN $\gamma$ APC<br>anti-Ki67 BUV395<br>anti-TNF PECy7                                                           | C92-605<br>SK7<br>2A3<br>NCAM16.2<br>FN50<br>DX12<br>L243<br>25723.11<br>B56<br>MAb11                          | <b>BD Biosciences</b>                 |
| anti-CD3 BV650<br>anti-CD4 BV711<br>anti-CD8 BV570<br>anti-CD38 BV421<br>anti-CD45 AF700<br>anti-IFN $\gamma$ BV785<br>anti-IL-17 BV421<br>anti-LAG-3 AF647<br>anti-PD-1 BV785<br>anti-V $\alpha$ 7.2 PE, APC, PECy7                                                | OKT3<br>OKT4<br>RPA-T8<br>HIT2<br>HI30<br>4S.B3<br>BL168<br>11C3C65<br>EH12.2H7<br>3C10                        | <b>BioLegend</b>                      |
| anti-CD69 ECD<br>anti-V $\beta$ 2 PE<br>anti-V $\beta$ 3 FITC<br>anti-V $\beta$ 7.2 PE<br>anti-V $\beta$ 8 PE<br>anti-V $\beta$ 11 PE<br>anti-V $\beta$ 13.1 PE<br>anti-V $\beta$ 13.2 PE<br>anti-V $\beta$ 13.6 PE<br>anti-V $\beta$ 17 PE<br>anti-V $\beta$ 20 PE | TP1.55.3<br>MPB2D5<br>CH92<br>Zizou4<br>56C5.2<br>C21<br>IMMU 222<br>H132<br>JU74.3<br>E17.5F3.15.13<br>ELL1.4 | <b>Beckman Coulter</b>                |
| LIVE/DEAD® Fixable Aqua, Green, and Near-IR Dead Cell Stain Kits<br>streptavidin Qdot 585                                                                                                                                                                           |                                                                                                                | <b>Invitrogen / Life Technologies</b> |
| Anti-TIM-3 AF488                                                                                                                                                                                                                                                    | 344823                                                                                                         | <b>R&amp;D Systems</b>                |
